# Supplementary material
Source: PubMed Central journal article supplement (PMC3778255)
Supplement: NIHMS54618-supplement-01.pdf [file NIHMS54618-supplement-01.pdf]

## METHODS

### Construction of linker DNA for the assembly of VH and VL fragments

For the construction of linker DNA, 24 separate PCR reactions (Platinum PCR Supermix; Invitrogen, Life Technologies, Carlsbad, Calif) were performed in which all possible combinations of the 4 VH- and 6 VL-specific primers<sup>E1</sup> were used to amplify a DNA sequence coding for a 15-amino-acid linker (Gly<sub>4</sub>Ser)<sub>3</sub>. Twenty-four linker products were purified on a 2% agarose gel, eluted as described, and ligated into the precut pSTBlue-1 AccepTor Vector (Novagen, Inc, Madison, Wis) that allows direct ligation of a PCR product with 3'-dA overhangs produced by Taq-Polymerase that anneal with 3'-dU on the vector. Sequences were confirmed by means of double-strand sequencing (Microsynth, Balgach, Switzerland) performed with the standard T7 and SP6 primers and were further used as templates for another PCR step, followed by purification, as previously described. Concentrations of the 24 separate linkers were determined by means of Nanodrop (Peqlab, Erlangen, Germany), and an equimolar mix was produced.

### Analysis of expression of constructed ScFvs

ScFvs were tested for reactivity with an antibody directed to the C-terminal peptide tag (E tag) by means of immunoblotting (Schleicher & Schuell, Dassel, Germany).<sup>E2</sup> Membrane-bound ScFvs were traced with a monoclonal mouse anti-E tag antibody (Amersham Biosciences), followed by a horseradish peroxidase-labeled sheep anti-mouse antiserum (Amersham Biosciences). Blots were developed with the ECL Plus Western Blotting Detection System (GE Healthcare, Fairfield, Conn), followed by exposure to Kodak XOMAT films with intensifying screens (Kodak, Heidelberg, Germany).

### Cross-reactivity of light chain-shuffled ScFvs with nitrocellulose-blotted natural grass pollen allergens

SDS extracts were prepared from pollen of 3 different grass species (*P pratense*: timothy grass; *P pratensis*: Kentucky bluegrass; and *L perenne*: ryegrass), as previously described.<sup>E3</sup> The extracts were subjected to SDS-PAGE under reducing conditions and blotted onto nitrocellulose membranes (Schleicher & Schuell). *E coli* lysates containing the soluble ScFvs (dilution 1:2) were exposed to nitrocellulose-blotted natural allergens. Natural Phl p 5 was detected with rabbit anti-sera specific for Phl p 5.<sup>E4</sup> Bound rabbit antibodies were traced with a horseradish peroxidase-labeled donkey anti-rabbit antiserum (Amersham Biosciences). Blots were developed as described previously.

## REFERENCES

- E1. Marks JD, Hoogenboom HR, Bonnert TP, McCafferty J, Griffiths AD, Winter G. By-passing immunization. Human antibodies from V-gene libraries displayed on phage. *J Mol Biol* 1991;222:581-97.
- E2. Towbin H, Staehelin T, Gordon J. Electrophoretic transfer of proteins from polyacrylamide gels to nitrocellulose sheets: procedure and some applications. *Proc Natl Acad Sci U S A* 1979;76:4350-4.
- E3. Madritsch C, Flicker S, Scheiblhofer S, Zafred D, Pavkov-Keller T, Thalhamer J, et al. Recombinant monoclonal human immunoglobulin E to investigate the allergenic activity of major grass pollen allergen Phl p 5. *Clin Exp Allergy* 2011;41:270-80.
- E4. Focke M, Marth K, Flicker S, Valenta R. Heterogeneity of commercial timothy grass pollen extracts. *Clin Exp Allergy* 2008;38:1400-8.

**A** Comparison of isolated heavy chains with germline genes

|                     | Isolated VH   | IGHV gene*allele_01 | Nucleotide sequence Identity | Accession No | IGHD gene*allele_01 | Nucleotide sequence Identity | Accession No | IGHJ gene*allele_01 | Nucleotide sequence Identity | Accession No |
|---------------------|---------------|---------------------|------------------------------|--------------|---------------------|------------------------------|--------------|---------------------|------------------------------|--------------|
| Phl p 5-specific VH | 5VH           | IGHV3-30-3*01       | 87.50%                       | X92283       | IGHD1-1*01          | 88.24%                       | X97051       | IGHJ3*01            | 94.00%                       | J00256       |
|                     |               | IGHV3-30*01         | 86.81%                       | M83134       | IGHD1-14*01         | 82.35%                       | X13972       | IGHJ4*01            | 75.00%                       | J00256       |
|                     |               | IGHV3-33*01         | 86.11%                       | AB019439     | IGHD1-20*01         | 82.35%                       | X97051       | IGHJ1*01            | 69.23%                       | J00256       |
|                     |               | IGHV3-NL1*01        | 83.33%                       | HM855939     | IGHD1-7*01          | 82.35%                       | X13972       | IGHJ5*01            | 68.63%                       | J00256       |
| Phl p 2-specific VH | 94VH          | IGHV3-7*01          | 81.25%                       | M99649       | IGHD7-27*01         | 72.73%                       | J00256       | IGHJ2*01            | 67.92%                       | J00256       |
|                     |               | IGHV4-31*01         | 92.47%                       | L10098       | IGHD5-18*01         | 80.00%                       | X97051       | IGHJ4*01            | 85.11%                       | J00256       |
|                     |               | IGHV4-30-4*01       | 91.76%                       | Z14238       | IGHD5-5*01          | 80.00%                       | X13972       | IGHJ5*01            | 82.00%                       | J00256       |
|                     |               | IGHV4-30-2*01       | 89.96%                       | L10089       | IGHD5-24*01         | 70.00%                       | X97051       | IGHJ3*01            | 75.51%                       | J00256       |
|                     |               | IGHV4-61*01         | 87.81%                       | M29811       | IGHD2-15*01         | 60.00%                       | J00234       | IGHJ1*01            | 74.51%                       | J00256       |
|                     |               | IGHV4-39*01         | 87.10%                       | AB019439     | IGHD3-16*01         | 60.00%                       | X93614       | IGHJ6*01            | 72.41%                       | J00256       |
|                     | 60VH          | IGHV4-30-4*01       | 91.40%                       | Z14238       | IGHD1-26*01         | 63.64%                       | X97051       | IGHJ4*01            | 85.11%                       | J00256       |
|                     |               | IGHV4-31*01         | 91.40%                       | L10098       | IGHD5-24*01         | 63.64%                       | X97051       | IGHJ5*01            | 78.00%                       | J00256       |
|                     |               | IGHV4-30-2*01       | 89.25%                       | L10089       | IGHD6-13*01         | 62.50%                       | X97051       | IGHJ1*01            | 76.47%                       | J00256       |
|                     |               | IGHV4-61*01         | 87.46%                       | M29811       | IGHD1-7*01          | 54.55%                       | X13972       | IGHJ3*01            | 75.51%                       | J00256       |
|                     |               | IGHV4-39*01         | 87.10%                       | AB019439     | IGHD5-12*01         | 53.85%                       | X13972       | IGHJ6*01            | 63.93%                       | J00256       |
|                     |               | IGHV4-30-4*01       | 94.27%                       | Z14238       | IGHD1-26*01         | 60.00%                       | X97051       | IGHJ4*01            | 87.23%                       | J00256       |
| 100VH               | IGHV4-31*01   | 94.27%              | L10098                       | IGHD5-24*01  | 60.00%              | X97051                       | IGHJ5*01     | 80.00%              | J00256                       |              |
|                     | IGHV4-30-2*01 | 92.11%              | L10089                       | IGHD6-13*01  | 60.00%              | X13972                       | IGHJ1*01     | 76.47%              | J00256                       |              |
|                     | IGHV4-59*01   | 90.48%              | AB019438                     | IGHD5-5*01   | 60.00%              | X13972                       | IGHJ3*01     | 73.47%              | J00256                       |              |
|                     | IGHV4-61*01   | 90.32%              | M29811                       | IGHD7-27*01  | 55.56%              | J00256                       | IGHJ6*01     | 68.97%              | J00256                       |              |
|                     | IGHV3-9*01    | 90.58%              | M99651                       | IGHD5-5*01   | 54.55%              | X13972                       | IGHJ4*01     | 91.49%              | J00256                       |              |
|                     | IGHV3-20*01   | 85.87%              | M99657                       | IGHD6-13*01  | 53.85%              | X13972                       | IGHJ5*01     | 80.00%              | J00256                       |              |
| Phl p 1-specific VH | 25VH          | IGHV3-43*01         | 85.14%                       | M99672       | IGHD6-6*01          | 53.33%                       | X13972       | IGHJ1*01            | 76.47%                       | J00256       |
|                     |               | IGHV3-23*01         | 82.97%                       | M99660       | IGHD2-15*01         | 52.94%                       | J00234       | IGHJ3*01            | 69.39%                       | J00256       |
|                     |               | IGHV3-48*01         | 82.97%                       | M99675       | IGHD4-23*01         | 52.94%                       | X97051       | IGHJ2*01            | 69.23%                       | J00256       |
|                     |               | IGHV3-9*01          | 93.84%                       | M99651       | IGHD1-26*01         | 69.23%                       | X97051       | IGHJ4*01            | 82.98%                       | J00256       |
|                     |               | IGHV3-20*01         | 88.04%                       | M99657       | IGHD2-15*01         | 68.75%                       | J00234       | IGHJ1*01            | 74.51%                       | J00256       |
|                     |               | IGHV3-43*01         | 88.04%                       | M99672       | IGHD2-2*01          | 68.75%                       | J00232       | IGHJ5*01            | 72.00%                       | J00256       |
|                     | 43VH          | IGHV3-h*01          | 83.15%                       | AJ879484     | IGHD6-25*01         | 61.54%                       | X97051       | IGHJ3*01            | 71.43%                       | J00256       |
|                     |               | IGHV3-48*01         | 82.61%                       | M99675       | IGHD3-10*01         | 58.82%                       | X13972       | IGHJ2*01            | 69.23%                       | J00256       |
|                     |               | IGHV3-9*01          | 92.75%                       | M99651       | IGHD1-26*01         | 69.23%                       | X97051       | IGHJ4*01            | 85.11%                       | J00256       |
|                     |               | IGHV3-20*01         | 86.59%                       | M99657       | IGHD2-15*01         | 68.75%                       | J00234       | IGHJ5*01            | 78.00%                       | J00256       |
|                     |               | IGHV3-43*01         | 85.51%                       | M99672       | IGHD1-7*01          | 61.54%                       | X13972       | IGHJ3*01            | 75.51%                       | J00256       |
|                     |               | IGHV3-h*01          | 83.15%                       | AJ879484     | IGHD6-25*01         | 61.54%                       | X97051       | IGHJ1*01            | 74.51%                       | J00256       |
| 10VH                | IGHV3-48*01   | 82.61%              | M99675                       | IGHD6-6*01   | 56.25%              | X13972                       | IGHJ2*01     | 69.23%              | J00256                       |              |

**FIG E1.** Comparison of VH (A) and VL (B) sequences from the original IgE Fabs with germline genes (allele\*01) from the ImMunoGeneTics database. The closest related germline genes and those with sequence identities of no less than 5% to the latter are displayed in boldface, together with their accession numbers and nucleotide sequence identities. Likewise, variable (IGHV), diverse (IGHD), and joining (IGHJ) genes of heavy chain sequences were identified in Fig E1, A, as well as variable (IGKV) and joining (IGKJ) genes of light chain sequences in Fig E1, B.

Comparison of isolated light chains with germline genes

**B**

|                     | Isolated VL  | IGKV gene*allele_01 | Nucleotide sequence Identity | Accession No | IGKJ gene*allele_01 | Nucleotide sequence Identity | Accession No |
|---------------------|--------------|---------------------|------------------------------|--------------|---------------------|------------------------------|--------------|
| Phl p 5-specific VL | 5VL          | IGKV1-12*01         | 96.34%                       | V01577       | IGKJ2*01            | 94.12%                       | I00242       |
|                     |              | IGKV1D-12*01        | 95.60%                       | X17263       | IGKJ1*01            | 85.29%                       | J00242       |
|                     |              | IGKV1D-16*01        | 91.94%                       | K01323       | IGKJ3*01            | 79.41%                       | J00242       |
|                     |              | IGKV1-16*01         | 90.84%                       | J00248       | IGKJ4*01            | 79.41%                       | J00242       |
|                     | 14VL         | IGKV1-9*01          | 90.48%                       | Z00013       | IGKJ5*01            | 64.71%                       | J00242       |
|                     |              | IGKV1-39*01         | 95.70%                       | X59315       | IGKJ1*01            | 96.97%                       | I00242       |
|                     |              | IGKV1D-39*01        | 95.70%                       | X59312       | IGKJ4*01            | 78.79%                       | J00242       |
|                     |              | IGKV1-17*01         | 89.25%                       | X72808       | IGKJ2*01            | 75.76%                       | J00242       |
|                     |              | IGKV1-6*01          | 89.25%                       | M64858       | IGKJ3*01            | 75.76%                       | J00242       |
|                     |              | IGKV1-NL1*01        | 89.25%                       | Y14865       | IGKJ5*01            | 66.67%                       | J00242       |
|                     | 28VL         | IGKV1-39*01         | 93.04%                       | X59315       | IGKJ1*01            | 90.62%                       | I00242       |
|                     |              | IGKV1D-39*01        | 93.04%                       | X59312       | IGKJ3*01            | 78.12%                       | J00242       |
|                     |              | IGKV1-9*01          | 86.81%                       | Z00013       | IGKJ4*01            | 75.00%                       | J00242       |
|                     |              | IGKV1-6*01          | 86.45%                       | M64858       | IGKJ2*01            | 71.88%                       | J00242       |
|                     | 31VL         | IGKV1D-13*01        | 86.45%                       | X17262       | IGKJ5*01            | 68.75%                       | J00242       |
|                     |              | IGKV1-39*01         | 97.49%                       | X59315       | IGKJ2*01            | 94.12%                       | I00242       |
| IGKV1D-39*01        |              | 97.49%              | X59312                       | IGKJ1*01     | 73.53%              | J00242                       |              |
| IGKV1-12*01         |              | 91.40%              | V01577                       | IGKJ3*01     | 73.53%              | J00242                       |              |
| IGKV1-9*01          |              | 90.68%              | Z00013                       | IGKJ4*01     | 73.53%              | J00242                       |              |
| IGKV1D-12*01        |              | 90.68%              | X17263                       | IGKJ5*01     | 73.53%              | J00242                       |              |
| Phl p 2-specific VL | 94VL         | IGKV1-39*01         | 93.77%                       | X59315       | IGKJ2*01            | 94.87%                       | I00242       |
|                     |              | IGKV1D-39*01        | 93.77%                       | X59312       | IGKJ1*01            | 84.21%                       | J00242       |
|                     |              | IGKV1-12*01         | 88.64%                       | V01577       | IGKJ4*01            | 84.21%                       | J00242       |
|                     |              | IGKV1-9*01          | 88.64%                       | Z00013       | IGKJ3*01            | 81.58%                       | J00242       |
|                     | 60VL         | IGKV1-17*01         | 88.28%                       | X72808       | IGKJ5*01            | 71.05%                       | J00242       |
|                     |              | IGKV1-39*01         | 92.67%                       | X59315       | IGKJ3*01            | 86.84%                       | I00242       |
|                     |              | IGKV1D-39*01        | 92.67%                       | X59312       | IGKJ2*01            | 82.05%                       | J00242       |
|                     |              | IGKV1-12*01         | 86.81%                       | V01577       | IGKJ1*01            | 76.32%                       | J00242       |
|                     | 100VL        | IGKV1-37*01         | 86.81%                       | X59316       | IGKJ4*01            | 73.68%                       | J00242       |
|                     |              | IGKV1D-37*01        | 86.81%                       | X71893       | IGKJ5*01            | 73.68%                       | J00242       |
|                     |              | IGKV1-12*01         | 95.97%                       | V01577       | IGKJ2*01            | 94.74%                       | I00242       |
|                     |              | IGKV1D-12*01        | 95.24%                       | X17263       | IGKJ1*01            | 86.84%                       | J00242       |
| Phl p 1-specific VL | 25VL         | IGKV1D-16*01        | 91.58%                       | K01323       | IGKJ3*01            | 81.58%                       | J00242       |
|                     |              | IGKV1-16*01         | 90.48%                       | J00248       | IGKJ4*01            | 81.58%                       | J00242       |
|                     |              | IGKV1-9*01          | 90.11%                       | Z00013       | IGKJ5*01            | 68.42%                       | J00242       |
|                     |              | IGKV1-39*01         | 95.24%                       | X59315       | IGKJ5*01            | 97.37%                       | I00242       |
|                     | 43VL         | IGKV1D-39*01        | 95.24%                       | X59312       | IGKJ2*01            | 71.05%                       | J00242       |
|                     |              | IGKV1-12*01         | 90.11%                       | V01577       | IGKJ4*01            | 71.05%                       | J00242       |
|                     |              | IGKV1-17*01         | 89.38%                       | X72808       | IGKJ1*01            | 68.42%                       | J00242       |
|                     |              | IGKV1D-12*01        | 89.38%                       | X17263       | IGKJ3*01            | 68.42%                       | J00242       |
|                     | 10VL         | IGKV1-39*01         | 90.32%                       | X59315       | IGKJ4*01            | 89.47%                       | I00242       |
|                     |              | IGKV1D-39*01        | 90.32%                       | X59312       | IGKJ2*01            | 76.32%                       | J00242       |
|                     |              | IGKV1-17*01         | 85.66%                       | X72808       | IGKJ3*01            | 76.32%                       | J00242       |
|                     |              | IGKV1-9*01          | 85.66%                       | Z00013       | IGKJ1*01            | 73.68%                       | J00242       |
| 10VL                | IGKV1-12*01  | 84.95%              | V01577                       | IGKJ5*01     | 65.79%              | J00242                       |              |
|                     | IGKV1-39*01  | 91.76%              | X59315                       | IGKJ4*01     | 97.37%              | I00242                       |              |
|                     | IGKV1D-39*01 | 91.76%              | X59312                       | IGKJ1*01     | 81.58%              | J00242                       |              |
|                     | IGKV1-12*01  | 86.38%              | V01577                       | IGKJ3*01     | 81.58%              | J00242                       |              |
| 10VL                | IGKV1-27*01  | 86.02%              | X63398                       | IGKJ2*01     | 78.95%              | J00242                       |              |
|                     | IGKV1-9*01   | 86.02%              | Z00013                       | IGKJ5*01     | 71.05%              | J00242                       |              |

FIG E1. (Continued)

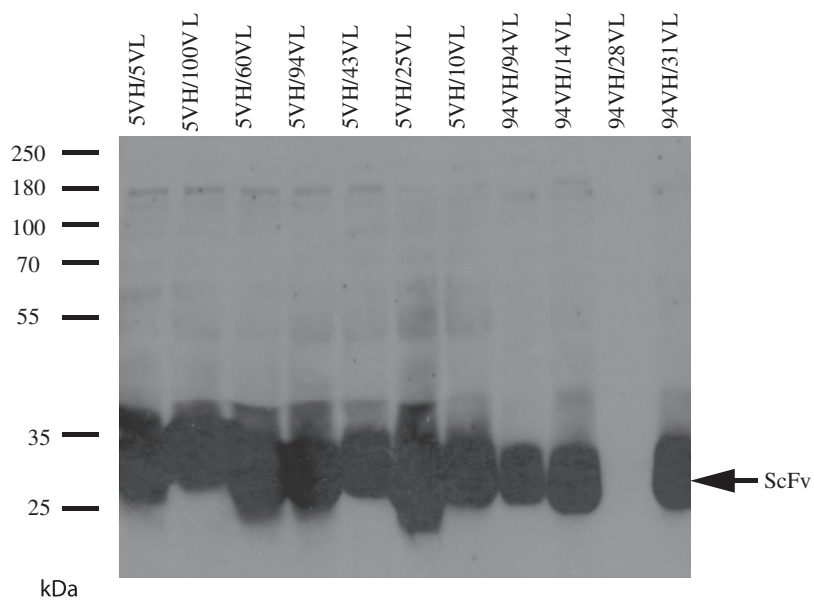

**FIG E2.** Detection of complete ScFvs in nitrocellulose-blotted bacterial lysates with an anti-E tag antibody. The analysis of a representative number of bacterial clones expressing original and shuffled ScFvs (*top*) is shown. Molecular weight markers (in kilodaltons) are indicated on the *left margin*.

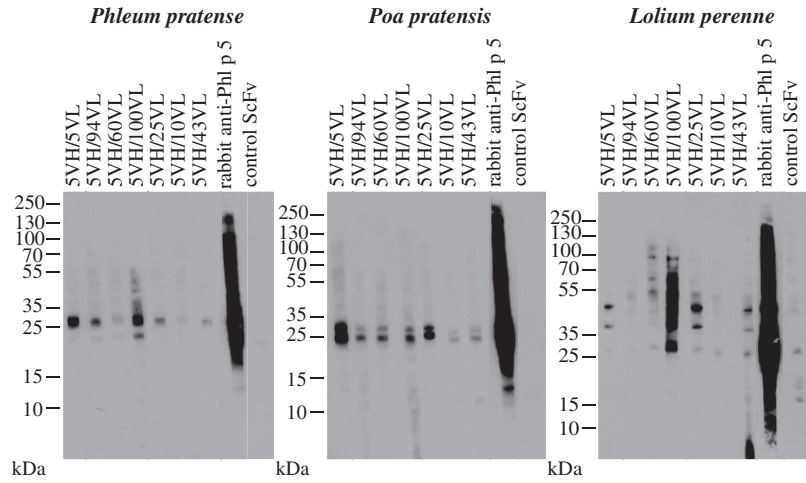

**FIG E3.** Detection of cross-reactivity of original and shuffled ScFvs and a control ScFv (top) to nitrocellulose-blotted natural grass pollen extracts from *P pratense* (left), *P pratensis* (middle), and *L perenne* (right). Rabbit anti-Phl p 5 antiserum was used to identify group 5 allergens in the extracts. Molecular weight markers (in kilodaltons) are displayed on the left margin.

**TABLE E1.** Amino acid sequence identities (in percentages) and mean percentage sequence identities between the analyzed VL regions are displayed

|                  | Phl p 1-specific |      |      |       | Phl p 2-specific |      |       |       | Phl p 5-specific |      |      |      |       |
|------------------|------------------|------|------|-------|------------------|------|-------|-------|------------------|------|------|------|-------|
|                  | 25VL             | 43VL | 10VL | Mean  | 94VL             | 60VL | 100VL | Mean  | 5VL              | 28VL | 31VL | 14VL | Mean  |
| Phl p 1 specific |                  |      |      |       |                  |      |       |       |                  |      |      |      |       |
| 25VL             | 100%             |      |      | 82.7% |                  |      |       |       |                  |      |      |      |       |
| 43VL             | 82%              | 100% |      |       |                  |      |       |       |                  |      |      |      |       |
| 10VL             | 83%              | 83%  | 100% |       |                  |      |       |       |                  |      |      |      |       |
| Phl p 2 specific |                  |      |      |       |                  |      |       |       |                  |      |      |      |       |
| 94VL             | 83%              | 75%  | 78%  | 78.8% | 100%             |      |       | 81.0% |                  |      |      |      |       |
| 60VL             | 82%              | 79%  | 79%  |       | 82%              | 100% |       |       |                  |      |      |      |       |
| 100VL            | 83%              | 74%  | 76%  |       | 81%              | 80%  | 100%  |       |                  |      |      |      |       |
| Phl p 5 specific |                  |      |      |       |                  |      |       |       |                  |      |      |      |       |
| 5VL              | 83%              | 74%  | 76%  | 82.2% | 81%              | 80%  | 100%  | 85.2% | 100%             |      |      |      | 86.0% |
| 28VL             | 88%              | 81%  | 84%  |       | 83%              | 84%  | 82%   |       | 82%              | 100% |      |      |       |
| 31VL             | 90%              | 82%  | 82%  |       | 86%              | 85%  | 87%   |       | 87%              | 89%  | 100% |      |       |
| 14VL             | 87%              | 79%  | 80%  |       | 88%              | 83%  | 83%   |       | 83%              | 86%  | 89%  | 100% |       |
